# Supplementary material
Source: publisher figshare collection journal article supplement (https://future-science-group.figshare.com/ndownloader/files/31952504)
Supplement: Supplementary file 1 [file 31952504]

# CaboPoint: a Phase II study of cabozantinib as second-line treatment in patients with metastatic renal cell carcinoma

Laurence Albiges, Manuela Schmidinger, Naila Taguieva-Pioger, David Perol, Viktor Grünwald & Eric Guemas

ClinicalTrials.gov identifier: NCT03945773. EudraCT number: 2018-002820-18

Albiges et al. *Future Oncology* (2021) <https://www.futuremedicine.com/doi/10.2217/fon-2021-1006>

### Objective

To investigate the

**efficacy**

**safety**

of **2L cabozantinib** in adults with **unresectable, locally advanced RCC or metastatic RCC with a clear cell component**



### Study periods

|             | Cabozantinib treatment period                                                                                                                                          | Post-treatment period               |
|-------------|------------------------------------------------------------------------------------------------------------------------------------------------------------------------|-------------------------------------|
| Study entry | <div><b>Cohort A</b><br/>Prior CPI therapy (ipilimumab + nivolumab)<br/>N = 125</div> | Follow-up period (up to 18 months*) |
|             | <div><b>Cohort B</b><br/>Prior CPI plus VEGF-targeted therapy<br/>N = 125</div>       | Follow-up period (up to 18 months*) |

\*After the date that the last patient recruited has received their first cabozantinib dose

### End points

**Primary end point**

- ORR (evaluated by independent central review)\*

**Secondary end points**

- DCR, DOR, PFS and TTR (evaluated by independent central review)\*
- DCR, DOR, ORR, PFS and TTR (evaluated by local investigator)\*
- OS
- FKS1-DRS†
- Safety and tolerability

\*Based on RECIST version 1.1, and confirmed by a subsequent visit ≥28 days later. †Change in disease-related symptoms

### Study treatment

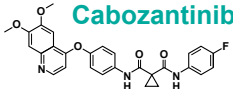**Cabozantinib**

**60 mg/day**

**Once daily**

**24 hours**

**Dose reductions permitted**

60 mg\*

40 mg

20 mg

\*Starting dose per protocol.

### Eligibility criteria

**Key inclusion criteria**



**Key exclusion criteria**

- At least one target lesion\*
- Disease progression†
- ECOG PS score of 0 or 1
- Adequate organ and marrow function

- Predominant non ccRCC
- Previous cabozantinib use
- Life expectancy <3 months
- Another active malignancy in the last 3 years

*Other inclusion/exclusion criteria apply*

\*According to RECIST version 1.1. †Radiographic disease progression after treatment with CPI alone (cohort A) or CPI plus VEGF-targeted therapy other than cabozantinib (cohort B).

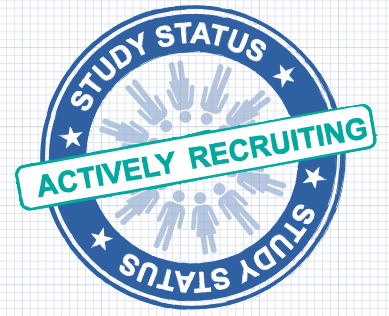

This infographic represents the opinions of the authors. For a full list of declarations including funding and author disclosure statements, please see the full text online. © 2021 The Authors.

2L: Second-line; ccRCC: Clear cell RCC; CPI: Checkpoint inhibitor; DCR: Disease control rate; DOR: Duration of response; ECOG PS: Eastern Cooperative Oncology Group Performance Status; FKS1-DRS: Functional Assessment of Cancer Therapy–Kidney Symptom Index–Disease-Related Symptoms questionnaire; ORR: Objective response rate; OS: Overall survival; PFS: Progression-free survival; RCC: Renal cell carcinoma; RECIST: Response Evaluation Criteria in Solid Tumours; TTR: Time to response.
